# Supplementary material for: First report of cestode infection in the crustacean Artemia persimilis from Southern Chilean Patagonia and its relation with the Neotropical aquatic birds
Source: PeerJ. 2019 Aug 6;7:e7395. doi: 10.7717/peerj.7395 (PMC6688596; doi:10.7717/peerj.7395)
Supplement: File S1 [file peerj-07-7395-s003.xlsx]

## Sheet: Conflu_Apers
Confluaria podicipina measurements of cysticercoids IN BERLESE
Locality	Slide No.	data	Cyst with envelope L	Cyst with envelope W	Cyst length	Cyst width	Scolex L	Scolex W	Suckers	Rostellar sheath L	Rostellar sheath W	Rostellum L	Rostellum W	Number hooks	Shape hooks	Cercomer W
LC	11b	2017-11-01	113	83	80	45	50	38	20, 23			25	23	10	aploparaksoid	20
LC	12	2017-11-01	113	73	85	43	60	33	18, 20	50	18	25	18	10	aploparaksoid	13
LC	13	2017-11-01	113	85	85	45	55	38	20, 20					10	aploparaksoid	18
LC	14	2017-11-01			83	53	55	40						10	aploparaksoid
LC	15a	2017-11-01			100	53	60	38	18, 18					10	aploparaksoid
LC	16a	2017-11-01	185	110	93	50	63	38	16, 18	50	13	25	20	10	aploparaksoid	20
LAM	15	2017-11-01	150	85	100	55
Confluaria podicipina measurements of hooks
Locality	LC	LC	LC	LC	LC	LC	LC	LAM	LAM	LAM		Range	mean	N
Artemia No.	15	15	57	146	146	150	150	278	278	278
Total length	18	19	20	19	20	19	19	19	20	21		18 – 21	19.4	10
Blade	10	11	11	10	10	11	11	11	11	12		10 – 12	10.8	10
Handle	4	4	4	3	4	4	4	4	3	4		3 – 4	3.8	10
Guard	5	6	6	5	6	6	5	6	6	6		5 – 6	5.7	10

## Sheet: Fimbr_Apers
Fimbriarioides (?)- measurements cysticercoids in Berlese
slide No.	locality	data	cyst with envelope L	cyst with envelope W	Cyst length	Cyst width	Scolex L	Scolex W	diameter suckers	rostellar sheath L	rostellar sheath W	rostellum L	rostellum W	number hooks	shape hooks	Cercomer L	Cercomer W
18	cis	29.11.2017			210	193	115	145	58, 60	55	50			10	diorchoid
19	cis	29.11.2017			195	172	127	138	55, 55			50	45	10	diorchoid
20	cis	29.11.2017							65					10	diorchoid
3b	cis	17.04.2018			195	153			50, 45					10	diorchoid
4b	cis	17.04.2018			208	168	130	115	60	100	53	60	40	10	diorchoid
6b	cis	17.04.2018			205	163	125	130	60, 50, 55, 62	95	53	53	40	10	diorchoid
Fimbriarioides (?)- measurements cysticercoids in Glycerol
slide No.	locality	data	cyst with envelope L	cyst with envelope W	Cyst length	Cyst width	Scolex L	Scolex W	diameter suckers	rostellar sheath L	rostellar sheath W	rostellum L	rostellum W	number hooks	shape hooks	Cercomer L	Cercomer W
17	cis	29.11.2017			213	155								10	diorchoid	470	88
18	cis	29.11.2017			180	150								10	diorchoid
19	cis	29.11.2017			175	155								10	diorchoid
1b	cis	17.04.2018			180	143	125	100	45 , 45			70	45	10	diorchoid		63
3b	cis	17.04.2018	208	155										10	diorchoid
4b	cis	17.04.2018			190	150						58	35	10	diorchoid
5b	cis	17.04.2018	200	155	190	130	125	110	38 , 43	75	55	50	45	10	diorchoid
6b	cis	17.04.2018			190	153	123	123	38					10	diorchoid
7b	cis	17.04.2018			193	153	123	130	38 , 38	105	60	48	48	10	diorchoid
8b	cis	17.04.2018			215	163	118	115	38 , 40	100	55	50	48	10	diorchoid		38 , 40
5	lam	26.11.2017	315	265	193	149	128	105	49, 50	103	49	45	33	10	diorchoid
6	lam	26.11.2017	275	220	198	152	120	105	51, 53, 50, 48	108	50	45	38	10	diorchoid
7	lam	26.11.2017	300	260	188	152	123	98	51, 48, 48, 48	105	45	45	35	10	diorchoid
3	lam	18.04.2018	225	200	193	162	130	125	50, 50	98	50	50	45	10	diorchoid
Fimbriarioides (?) sp. - measurements of rostellar hooks
Locality	LC	LC	LC	LC	LC	LC	LC	LC	LC	LC		Range	mean	N
Artemia No.	132	132	132	132	160	145	90	90	137	137
Total length	33	33	33	33	35	33	33	32	34	34		32 – 35	33.3	10
Blade	14	14	14	14	14	13	13	13	15	14		13 – 15	13.8	10
Handle	16	17	17	16	20	17	17	17	17	17		16 – 20	17.1	10
Guard	3	4	4	4	4	4	3	3	4	4		3 – 4	3.7	10

## Sheet: Flam sp._Apers
Flamingolepis sp.- measurements cysticercoids in Berlese
slide No.	locality	data	Cyst length	Cyst width	Scolex L	Scolex W	Suckers L	Suckers W	rostellar sheath L	rostellar sheath W	rostellum L	rostellum W	number hooks	shape hooks
1	cis	29.11.2017	155	115	125	95	45, 48		133	38	125	25	8	skrjabinoid
4	cis	29.11.2017	155	110	125	90	50, 50	33, 35	x	x	120	25	8	skrjabinoid
5	cis	29.11.2017	150	125			x	x	x	x	110	28	8	skrjabinoid
6	cis	29.11.2017	163	113	125	93	50, 48	33, 28	125	33	125	23	8	skrjabinoid
7	cis	29.11.2017	153	125	125	95	45, 45	33, 35	133	38	115	25	8	skrjabinoid
10	cis	29.11.2017	163	115	113	90					100	25	8	skrjabinoid
11a	cis	29.11.2017	155	123	128	100	53, 53	35, 40		33	113	25	8	skrjabinoid
22a	cis	29.11.2017	150	145	115	98	50,45,50				100	25	8	skrjabinoid
Flamingolepis sp.- measurements cysticercoids in Glycerol
slide No.	locality	data	Cyst length	Cyst width	Scolex L	Scolex W	diameter suckers	Rostellar sheath L	Rostellar sheath W	rostellum L	rostellum W	number hooks	shape hooks	Cercomer L	Cercomer W
3	cis	29.11.2017	170	95	125	73	43,43,43,45	130	30	125	25	8	skrjabinoid	600	63-75
4	cis	29.11.2017	163	108	120	88	50,50,50,48	118	36	125	28	8	skrjabinoid
5	cis	29.11.2017	158	118	125	90	45, 45	118	38	123	28	8	skrjabinoid
7	cis	29.11.2017	160	113	125	93	43.43	125	33	125	25	8	skrjabinoid
8	cis	29.11.2017	168	123	118	96	50,50,50,50	125	38	125	25	8	skrjabinoid	500	40-50
Flamingolepis sp. 1 – rostellar hooks
Locality	LC	LC	LC	LC	LC	LC	LC	LC	LC	LC		LC	LC	LC	LC	LC		Range	mean	N
Artemia No.	45	157	157	157	157	172	172	145	145	15		15	15	15	96	194
Total length	49	49	49	49	48	48	48	50	50	50		49	49	48	48	50		48 – 50	48.9333	15
Blade	25	25	26	26	25	25	25	25	25	27		25	25	25	24	27		24 – 27	25.3333	15
Handle	23	24	24	23	23	23	23	26	26	23		24	24	23	21	24		21 – 26	23.6	15
R Lb/TL	51.0204	51.0204	53.0612	53.0612	52.0833	52.0833	52.0833	50	50	54		51.0204	51.0204	52.0833	50	54		50 – 54	51.7692	15

## Sheet: hooks Flam sp1-cis-berlese
Flamingolepis sp. – measurements of rostellar hooks
Locality	LC	LC	LC	LC	LC	LC	LC	LC	LC	LC	LC	LC	LC	LC	LC		Range	mean	N
Artemia No.	45	157	157	157	157	172	172	145	145	15	15	15	15	96	194
Total length	49	49	49	49	48	48	48	50	50	50	49	49	48	48	50		48 – 50	48.9333	15
Blade	25	25	26	26	25	25	25	25	25	27	25	25	25	24	27		24 – 27	25.3333	15
Handle	23	24	24	23	23	23	23	26	26	23	24	24	23	21	24		21 – 26	23.6	15
R Lb/TL	51.0204	51.0204	53.0612	53.0612	52.0833	52.0833	52.0833	50	50	54	51.0204	51.0204	52.0833	50	54		50 – 54	51.7692	15

## Sheet: Wardium_Apers
Wardium sp.- measurements cysticercoids in Glycerol
slide No.	locality	data	Cyst length	Cyst width	Scolex L	Scolex W	diameter suckers	Rostellar sheath L	Rostellar sheath W	rostellum L	rostellum W	number hooks	shape hooks
23	cis	29.11.2017	300	205	150	120	45,45,50,50	113	48	50	43	10	Aploparaksoid-like
9b	cis	29.11.2017	312	202	159		64 , 51					10	Aploparaksoid-like
Wardium sp.- measurements cysticercoids in Berlese
slide No.	locality	data	Cyst length	Cyst width	Scolex L	Scolex W	diameter suckers	Rostellar sheath L	Rostellar sheath W	rostellum L	rostellum W	number hooks	shape hooks
23	cis	29.11.2017	300	215	150	118	65, 60	125	45	55	45	10	Aploparaksoid-like
9b	cis	29.11.2017	315	225	195	185	43, 45, 45, 48	125		75	50	10	Aploparaksoid-like
Wardium – hooks (Berlese, No. 23/ Artemia No. 164 LC)
Locality	LC	LC	LC	LC		Range	mean	N
Artemia No.	164	164	164	164
Total length	25	25	25	26		25 – 26	25.25	4
Blade	12	12	12	13		12 – 13	12.25	4
Base	18	18	19	18		18 – 19	18.25	4
Distance between blade-tip and guard-tip	9	10	10	9		9 – 10	9.5	4
