# Supplementary material for: First report of cestode infection in the crustacean Artemia persimilis from Southern Chilean Patagonia and its relation with the Neotropical aquatic birds
Source: PeerJ. 2019 Aug 6;7:e7395. doi: 10.7717/peerj.7395 (PMC6688596; doi:10.7717/peerj.7395)
Supplement: File S2 [file peerj-07-7395-s004.xlsx]

## Sheet: Notes
	First report of cestode infection in the crustacean Artemia persimilis from Southern Chilean Patagonia and its relation with the Neotropical aquatic birds
	Stella Redón, Gergana P. Vasileva, Boyko B. Georgiev, Gonzalo Gajardo

## Sheet: Cisnes lagoon-Nov
# indiv	site	month	year	ARTEMIA	Confl podic	Ward sp.	Fimbr sp.	Flamin sp.	overall	SR	sex	stage
1	cisnes	11	2017	AP	1	0	0	0	1	1	female	ad
2	cisnes	11	2017	AP	0	0	0	0	0	0	female	ad
3	cisnes	11	2017	AP	0	0	0	0	0	0	female	ad
4	cisnes	11	2017	AP	0	0	0	0	0	0	female	ad
5	cisnes	11	2017	AP	0	0	0	0	0	0	female	ad
6	cisnes	11	2017	AP	0	0	0	0	0	0	female	ad
7	cisnes	11	2017	AP	0	0	0	0	0	0	female	ad
8	cisnes	11	2017	AP	0	0	0	0	0	0	female	ad
9	cisnes	11	2017	AP	0	0	0	0	0	0	female	ad
10	cisnes	11	2017	AP	1	0	0	0	1	1	female	ad
11	cisnes	11	2017	AP	0	0	0	0	0	0	female	ad
12	cisnes	11	2017	AP	0	0	0	0	0	0	female	ad
13	cisnes	11	2017	AP	0	0	0	0	0	0	female	ad
14	cisnes	11	2017	AP	0	0	0	0	0	0	female	ad
15	cisnes	11	2017	AP	1	0	0	1	2	2	female	ad
16	cisnes	11	2017	AP	1	0	0	0	1	1	female	ad
17	cisnes	11	2017	AP	0	0	0	0	0	0	female	ad
18	cisnes	11	2017	AP	0	0	0	0	0	0	female	ad
19	cisnes	11	2017	AP	0	0	0	0	0	0	female	ad
20	cisnes	11	2017	AP	0	0	0	0	0	0	male	ad
21	cisnes	11	2017	AP	0	0	0	0	0	0	male	ad
22	cisnes	11	2017	AP	0	0	0	0	0	0	female	ad
23	cisnes	11	2017	AP	0	0	0	1	1	1	female	ad
24	cisnes	11	2017	AP	0	0	0	0	0	0	female	ad
25	cisnes	11	2017	AP	0	0	0	0	0	0	female	ad
26	cisnes	11	2017	AP	0	0	0	0	0	0	female	ad
27	cisnes	11	2017	AP	0	0	0	0	0	0	female	ad
28	cisnes	11	2017	AP	0	0	0	1	1	1	female	ad
29	cisnes	11	2017	AP	0	0	0	0	0	0	female	ad
30	cisnes	11	2017	AP	0	0	0	0	0	0	female	ad
31	cisnes	11	2017	AP	0	0	0	1	1	1	female	ad
32	cisnes	11	2017	AP	0	0	0	0	0	0	female	ad
33	cisnes	11	2017	AP	0	0	0	0	0	0	female	ad
34	cisnes	11	2017	AP	0	0	0	0	0	0	female	ad
35	cisnes	11	2017	AP	0	0	0	0	0	0	female	ad
36	cisnes	11	2017	AP	0	0	0	1	1	1	female	ad
37	cisnes	11	2017	AP	0	0	0	0	0	0	female	ad
38	cisnes	11	2017	AP	0	0	0	0	0	0	female	ad
39	cisnes	11	2017	AP	0	0	0	1	1	1	female	ad
40	cisnes	11	2017	AP	0	0	0	0	0	0	female	ad
41	cisnes	11	2017	AP	0	0	0	0	0	0	female	ad
42	cisnes	11	2017	AP	0	0	0	0	0	0	female	ad
43	cisnes	11	2017	AP	0	0	0	0	0	0	female	ad
44	cisnes	11	2017	AP	0	0	0	0	0	0	female	ad
45	cisnes	11	2017	AP	0	0	0	1	1	1	female	ad
46	cisnes	11	2017	AP	0	0	0	1	1	1	female	ad
47	cisnes	11	2017	AP	0	0	0	0	0	0	female	ad
48	cisnes	11	2017	AP	0	0	0	1	1	1	female	ad
49	cisnes	11	2017	AP	0	0	1	0	1	1	female	ad
50	cisnes	11	2017	AP	0	0	0	0	0	0	female	ad
51	cisnes	11	2017	AP	0	0	0	1	1	1	female	ad
52	cisnes	11	2017	AP	0	0	0	0	0	0	female	ad
53	cisnes	11	2017	AP	0	0	0	0	0	0	female	ad
54	cisnes	11	2017	AP	0	0	0	0	0	0	female	ad
55	cisnes	11	2017	AP	0	0	0	1	1	1	female	ad
56	cisnes	11	2017	AP	0	0	0	0	0	0	female	ad
57	cisnes	11	2017	AP	1	0	0	0	1	1	female	ad
58	cisnes	11	2017	AP	0	0	0	0	0	0	female	ad
59	cisnes	11	2017	AP	0	0	0	0	0	0	female	ad
60	cisnes	11	2017	AP	0	0	0	1	1	1	female	ad
61	cisnes	11	2017	AP	0	0	0	0	0	0	female	ad
62	cisnes	11	2017	AP	0	0	0	0	0	0	female	ad
63	cisnes	11	2017	AP	0	0	0	1	1	1	female	ad
64	cisnes	11	2017	AP	0	0	0	0	0	0	female	ad
65	cisnes	11	2017	AP	0	0	0	0	0	0	female	ad
66	cisnes	11	2017	AP	0	0	0	1	1	1	female	ad
67	cisnes	11	2017	AP	0	0	0	1	1	1	female	ad
68	cisnes	11	2017	AP	0	0	0	1	1	1	female	ad
69	cisnes	11	2017	AP	0	0	0	0	0	0	female	ad
70	cisnes	11	2017	AP	0	0	0	0	0	0	female	ad
71	cisnes	11	2017	AP	0	0	0	0	0	0	female	ad
72	cisnes	11	2017	AP	0	0	0	0	0	0	female	ad
73	cisnes	11	2017	AP	0	0	0	0	0	0	female	ad
74	cisnes	11	2017	AP	0	0	0	0	0	0	female	ad
75	cisnes	11	2017	AP	0	0	0	0	0	0	female	ad
76	cisnes	11	2017	AP	0	0	0	0	0	0	female	ad
77	cisnes	11	2017	AP	0	0	0	1	1	1	female	ad
78	cisnes	11	2017	AP	0	0	0	0	0	0	female	ad
79	cisnes	11	2017	AP	0	0	0	0	0	0	female	ad
80	cisnes	11	2017	AP	0	0	0	0	0	0	female	ad
81	cisnes	11	2017	AP	0	0	0	0	0	0	female	ad
82	cisnes	11	2017	AP	0	0	0	1	1	1	female	ad
83	cisnes	11	2017	AP	0	0	0	0	0	0	female	ad
84	cisnes	11	2017	AP	0	0	0	1	1	1	female	ad
85	cisnes	11	2017	AP	0	0	0	1	1	1	female	ad
86	cisnes	11	2017	AP	0	0	0	0	0	0	female	ad
87	cisnes	11	2017	AP	0	0	0	0	0	0	female	ad
88	cisnes	11	2017	AP	0	0	0	0	0	0	female	ad
89	cisnes	11	2017	AP	0	0	0	0	0	0	female	ad
90	cisnes	11	2017	AP	0	0	0	0	0	0	female	ad
91	cisnes	11	2017	AP	0	0	0	1	1	1	female	ad
92	cisnes	11	2017	AP	0	0	0	0	0	0	female	ad
93	cisnes	11	2017	AP	0	0	0	0	0	0	female	ad
94	cisnes	11	2017	AP	0	0	0	0	0	0	female	ad
95	cisnes	11	2017	AP	0	0	0	0	0	0	female	ad
96	cisnes	11	2017	AP	0	0	0	1	1	1	female	ad
97	cisnes	11	2017	AP	0	0	0	1	1	1	female	ad
98	cisnes	11	2017	AP	0	0	0	0	0	0	female	ad
99	cisnes	11	2017	AP	0	0	0	1	1	1	female	ad
100	cisnes	11	2017	AP	1	0	0	0	1	1	female	ad
101	cisnes	11	2017	AP	0	0	0	0	0	0	male	ad
102	cisnes	11	2017	AP	0	0	0	0	0	0	male	ad
103	cisnes	11	2017	AP	0	0	0	0	0	0	male	ad
104	cisnes	11	2017	AP	0	0	0	1	1	1	male	ad
105	cisnes	11	2017	AP	0	0	0	0	0	0	male	ad
106	cisnes	11	2017	AP	0	0	0	0	0	0	male	ad
107	cisnes	11	2017	AP	0	0	0	0	0	0	male	ad
108	cisnes	11	2017	AP	0	0	0	0	0	0	male	ad
109	cisnes	11	2017	AP	0	0	0	0	0	0	male	ad
110	cisnes	11	2017	AP	0	0	0	1	1	1	male	ad
111	cisnes	11	2017	AP	1	0	0	2	3	2	male	ad
112	cisnes	11	2017	AP	0	0	0	0	0	0	male	ad
113	cisnes	11	2017	AP	0	0	0	0	0	0	male	ad
114	cisnes	11	2017	AP	0	0	0	0	0	0	male	ad
115	cisnes	11	2017	AP	0	0	0	1	1	1	male	ad
116	cisnes	11	2017	AP	0	0	0	1	1	1	male	ad
117	cisnes	11	2017	AP	0	0	0	0	0	0	male	ad
118	cisnes	11	2017	AP	0	0	0	0	0	0	male	ad
119	cisnes	11	2017	AP	0	0	0	1	1	1	male	ad
120	cisnes	11	2017	AP	1	0	0	1	2	2	male	ad
121	cisnes	11	2017	AP	0	0	0	0	0	0	male	ad
122	cisnes	11	2017	AP	0	0	0	0	0	0	male	ad
123	cisnes	11	2017	AP	0	0	0	1	1	1	male	ad
124	cisnes	11	2017	AP	0	0	0	1	1	1	male	ad
125	cisnes	11	2017	AP	0	0	0	0	0	0	male	ad
126	cisnes	11	2017	AP	0	0	0	0	0	0	male	ad
127	cisnes	11	2017	AP	0	0	0	0	0	0	male	ad
128	cisnes	11	2017	AP	0	0	0	0	0	0	male	ad
129	cisnes	11	2017	AP	0	0	0	0	0	0	male	ad
130	cisnes	11	2017	AP	0	0	0	1	1	1	male	ad
131	cisnes	11	2017	AP	0	0	0	0	0	0	male	ad
132	cisnes	11	2017	AP	0	0	1	0	1	1	male	ad
133	cisnes	11	2017	AP	0	0	0	0	0	0	male	ad
134	cisnes	11	2017	AP	0	0	0	0	0	0	male	ad
135	cisnes	11	2017	AP	0	0	0	0	0	0	male	ad
136	cisnes	11	2017	AP	0	0	0	0	0	0	male	ad
137	cisnes	11	2017	AP	0	0	1	0	1	1	male	ad
138	cisnes	11	2017	AP	0	0	0	0	0	0	male	ad
139	cisnes	11	2017	AP	0	0	0	0	0	0	male	ad
140	cisnes	11	2017	AP	0	0	0	0	0	0	male	ad
141	cisnes	11	2017	AP	0	0	0	0	0	0	male	ad
142	cisnes	11	2017	AP	0	0	0	0	0	0	male	ad
143	cisnes	11	2017	AP	0	0	0	0	0	0	male	ad
144	cisnes	11	2017	AP	0	0	0	0	0	0	male	ad
145	cisnes	11	2017	AP	0	0	1	1	2	2	male	ad
146	cisnes	11	2017	AP	1	0	0	0	1	1	male	ad
147	cisnes	11	2017	AP	0	0	0	1	1	1	male	ad
148	cisnes	11	2017	AP	0	0	0	0	0	0	male	ad
149	cisnes	11	2017	AP	0	0	0	0	0	0	male	ad
150	cisnes	11	2017	AP	1	0	0	0	1	1	male	ad
151	cisnes	11	2017	AP	0	0	0	1	1	1	male	ad
152	cisnes	11	2017	AP	0	0	0	0	0	0	male	ad
153	cisnes	11	2017	AP	0	0	0	0	0	0	male	ad
154	cisnes	11	2017	AP	0	0	0	1	1	1	male	ad
155	cisnes	11	2017	AP	0	0	0	0	0	0	male	ad
156	cisnes	11	2017	AP	0	0	0	0	0	0	male	ad
157	cisnes	11	2017	AP	0	0	0	1	1	1	male	ad
158	cisnes	11	2017	AP	0	0	0	0	0	0	male	ad
159	cisnes	11	2017	AP	0	0	0	0	0	0	male	ad
160	cisnes	11	2017	AP	0	0	1	0	1	1	male	ad
161	cisnes	11	2017	AP	0	0	0	0	0	0	male	ad
162	cisnes	11	2017	AP	0	0	0	0	0	0	male	ad
163	cisnes	11	2017	AP	0	0	0	0	0	0	male	ad
164	cisnes	11	2017	AP	0	1	0	0	1	1	male	ad
165	cisnes	11	2017	AP	0	0	1	0	1	1	male	ad
166	cisnes	11	2017	AP	0	0	0	0	0	0	male	ad
167	cisnes	11	2017	AP	0	0	0	0	0	0	male	ad
168	cisnes	11	2017	AP	0	0	0	0	0	0	male	ad
169	cisnes	11	2017	AP	0	0	0	0	0	0	male	ad
170	cisnes	11	2017	AP	0	0	0	0	0	0	male	ad
171	cisnes	11	2017	AP	0	0	0	0	0	0	male	ad
172	cisnes	11	2017	AP	0	0	0	1	1	1	male	ad
173	cisnes	11	2017	AP	0	0	0	0	0	0	male	ad
174	cisnes	11	2017	AP	0	0	0	1	1	1	male	ad
175	cisnes	11	2017	AP	0	0	0	0	0	0	male	ad
176	cisnes	11	2017	AP	0	0	0	1	1	1	male	ad
177	cisnes	11	2017	AP	0	0	0	0	0	0	male	ad
178	cisnes	11	2017	AP	0	0	0	1	1	1	male	ad
179	cisnes	11	2017	AP	0	0	0	1	1	1	male	ad
180	cisnes	11	2017	AP	0	0	0	1	1	1	male	ad
181	cisnes	11	2017	AP	0	0	0	1	1	1	male	ad
182	cisnes	11	2017	AP	0	0	1	0	1	1	male	ad
183	cisnes	11	2017	AP	0	0	0	0	0	0	male	ad
184	cisnes	11	2017	AP	0	0	0	0	0	0	male	ad
185	cisnes	11	2017	AP	0	0	0	0	0	0	male	ad
186	cisnes	11	2017	AP	0	0	0	1	1	1	male	ad
187	cisnes	11	2017	AP	0	0	0	0	0	0	male	ad
188	cisnes	11	2017	AP	0	0	0	1	1	1	male	ad
189	cisnes	11	2017	AP	0	0	0	0	0	0	male	ad
190	cisnes	11	2017	AP	0	0	0	0	0	0	male	ad
191	cisnes	11	2017	AP	0	0	0	1	1	1	male	ad
192	cisnes	11	2017	AP	0	0	0	1	1	1	male	ad
193	cisnes	11	2017	AP	0	0	0	0	0	0	male	ad
194	cisnes	11	2017	AP	0	0	0	1	1	1	male	ad
195	cisnes	11	2017	AP	0	0	0	1	1	1	male	ad
196	cisnes	11	2017	AP	0	0	0	1	1	1	male	ad
197	cisnes	11	2017	AP	0	0	0	1	1	1	male	ad
198	cisnes	11	2017	AP	0	0	0	0	0	0	male	ad
199	cisnes	11	2017	AP	0	0	0	1	1	1	male	ad
200	cisnes	11	2017	AP	0	0	0	0	0	0	male	ad

## Sheet: Cisnes lagoon-April
# indiv	site	month	year	ARTEMIA	Confl podic	Ward sp.	Fimbr sp.	Flamin sp.	overall	SR	sex	stage
1	cisnes	4	2018	AP	0	0	0	0	0	0	male	ad
2	cisnes	4	2018	AP	0	0	0	0	0	0	male	ad
3	cisnes	4	2018	AP	0	0	0	0	0	0	male	ad
4	cisnes	4	2018	AP	0	0	0	0	0	0	male	ad
5	cisnes	4	2018	AP	0	0	0	0	0	0	male	ad
6	cisnes	4	2018	AP	0	0	0	0	0	0	male	ad
7	cisnes	4	2018	AP	0	0	1	0	1	1	male	ad
8	cisnes	4	2018	AP	0	0	0	0	0	0	male	ad
9	cisnes	4	2018	AP	0	0	0	0	0	0	male	ad
10	cisnes	4	2018	AP	0	0	0	0	0	0	male	ad
11	cisnes	4	2018	AP	0	0	0	0	0	0	male	ad
12	cisnes	4	2018	AP	0	0	0	0	0	0	male	ad
13	cisnes	4	2018	AP	0	0	0	0	0	0	male	ad
14	cisnes	4	2018	AP	0	0	0	0	0	0	male	ad
15	cisnes	4	2018	AP	0	0	0	0	0	0	male	ad
16	cisnes	4	2018	AP	0	0	0	0	0	0	male	ad
17	cisnes	4	2018	AP	0	0	1	0	1	1	male	ad
18	cisnes	4	2018	AP	0	0	0	0	0	0	male	ad
19	cisnes	4	2018	AP	0	0	1	0	1	1	male	ad
20	cisnes	4	2018	AP	0	0	0	0	0	0	male	ad
21	cisnes	4	2018	AP	0	0	0	0	0	0	male	ad
22	cisnes	4	2018	AP	0	0	0	0	0	0	male	ad
23	cisnes	4	2018	AP	0	0	1	0	1	1	male	ad
24	cisnes	4	2018	AP	0	0	0	0	0	0	male	ad
25	cisnes	4	2018	AP	0	0	0	0	0	0	male	ad
26	cisnes	4	2018	AP	0	0	0	0	0	0	male	ad
27	cisnes	4	2018	AP	0	0	0	0	0	0	male	ad
28	cisnes	4	2018	AP	0	0	0	0	0	0	male	ad
29	cisnes	4	2018	AP	0	0	0	0	0	0	male	ad
30	cisnes	4	2018	AP	0	0	0	0	0	0	male	ad
31	cisnes	4	2018	AP	0	0	0	0	0	0	male	ad
32	cisnes	4	2018	AP	0	0	0	0	0	0	male	ad
33	cisnes	4	2018	AP	0	0	0	0	0	0	male	ad
34	cisnes	4	2018	AP	0	0	0	0	0	0	male	ad
35	cisnes	4	2018	AP	0	0	0	0	0	0	male	ad
36	cisnes	4	2018	AP	0	0	0	0	0	0	male	ad
37	cisnes	4	2018	AP	0	0	0	0	0	0	male	ad
38	cisnes	4	2018	AP	0	0	0	0	0	0	male	ad
39	cisnes	4	2018	AP	0	0	0	0	0	0	male	ad
40	cisnes	4	2018	AP	0	0	0	0	0	0	male	ad
41	cisnes	4	2018	AP	0	0	0	0	0	0	male	ad
42	cisnes	4	2018	AP	0	0	0	0	0	0	male	ad
43	cisnes	4	2018	AP	0	0	0	0	0	0	male	ad
44	cisnes	4	2018	AP	0	0	0	0	0	0	male	ad
45	cisnes	4	2018	AP	0	0	0	0	0	0	male	ad
46	cisnes	4	2018	AP	0	0	0	0	0	0	male	ad
47	cisnes	4	2018	AP	0	0	1	0	1	1	male	ad
48	cisnes	4	2018	AP	0	0	0	0	0	0	male	ad
49	cisnes	4	2018	AP	0	0	0	0	0	0	male	ad
50	cisnes	4	2018	AP	0	0	1	0	1	1	male	ad
51	cisnes	4	2018	AP	0	0	0	0	0	0	male	ad
52	cisnes	4	2018	AP	0	0	0	0	0	0	male	ad
53	cisnes	4	2018	AP	0	0	0	0	0	0	male	ad
54	cisnes	4	2018	AP	0	0	0	0	0	0	male	ad
55	cisnes	4	2018	AP	0	0	0	0	0	0	male	ad
56	cisnes	4	2018	AP	0	0	0	0	0	0	male	ad
57	cisnes	4	2018	AP	0	0	0	0	0	0	male	ad
58	cisnes	4	2018	AP	0	0	0	0	0	0	male	ad
59	cisnes	4	2018	AP	0	0	0	0	0	0	male	ad
60	cisnes	4	2018	AP	0	0	0	0	0	0	male	ad
61	cisnes	4	2018	AP	0	0	0	0	0	0	male	ad
62	cisnes	4	2018	AP	0	0	0	0	0	0	male	ad
63	cisnes	4	2018	AP	0	0	0	0	0	0	male	ad
64	cisnes	4	2018	AP	0	0	0	0	0	0	male	ad
65	cisnes	4	2018	AP	0	0	0	0	0	0	male	ad
66	cisnes	4	2018	AP	0	0	0	0	0	0	male	ad
67	cisnes	4	2018	AP	0	0	0	0	0	0	male	ad
68	cisnes	4	2018	AP	0	0	0	0	0	0	male	ad
69	cisnes	4	2018	AP	0	0	0	0	0	0	male	ad
70	cisnes	4	2018	AP	0	0	0	0	0	0	male	ad
71	cisnes	4	2018	AP	0	0	0	0	0	0	male	ad
72	cisnes	4	2018	AP	0	0	0	0	0	0	male	ad
73	cisnes	4	2018	AP	0	0	0	0	0	0	male	ad
74	cisnes	4	2018	AP	0	0	0	0	0	0	male	ad
75	cisnes	4	2018	AP	0	0	0	0	0	0	male	ad
76	cisnes	4	2018	AP	0	0	0	0	0	0	male	ad
77	cisnes	4	2018	AP	0	0	0	0	0	0	male	ad
78	cisnes	4	2018	AP	0	0	0	0	0	0	male	ad
79	cisnes	4	2018	AP	0	0	0	0	0	0	male	ad
80	cisnes	4	2018	AP	0	0	0	0	0	0	male	ad
81	cisnes	4	2018	AP	0	0	0	0	0	0	male	ad
82	cisnes	4	2018	AP	0	0	0	0	0	0	male	ad
83	cisnes	4	2018	AP	0	0	0	0	0	0	male	ad
84	cisnes	4	2018	AP	0	0	0	0	0	0	male	ad
85	cisnes	4	2018	AP	0	0	0	0	0	0	male	ad
86	cisnes	4	2018	AP	0	0	0	0	0	0	male	ad
87	cisnes	4	2018	AP	0	0	0	0	0	0	male	ad
88	cisnes	4	2018	AP	0	0	0	0	0	0	male	ad
89	cisnes	4	2018	AP	0	0	0	0	0	0	male	ad
90	cisnes	4	2018	AP	0	0	1	0	1	1	male	ad
91	cisnes	4	2018	AP	0	0	0	0	0	0	male	ad
92	cisnes	4	2018	AP	0	0	1	0	1	1	male	ad
93	cisnes	4	2018	AP	0	0	0	0	0	0	male	ad
94	cisnes	4	2018	AP	0	0	0	0	0	0	male	ad
95	cisnes	4	2018	AP	0	0	0	0	0	0	male	ad
96	cisnes	4	2018	AP	0	0	0	0	0	0	male	ad
97	cisnes	4	2018	AP	0	0	0	0	0	0	male	ad
98	cisnes	4	2018	AP	0	0	0	0	0	0	male	ad
99	cisnes	4	2018	AP	0	0	0	0	0	0	male	ad
100	cisnes	4	2018	AP	0	0	0	0	0	0	male	ad
101	cisnes	4	2018	AP	0	0	0	0	0	0	female	ad
102	cisnes	4	2018	AP	0	0	0	0	0	0	female	ad
103	cisnes	4	2018	AP	0	0	0	0	0	0	female	ad
104	cisnes	4	2018	AP	0	0	0	0	0	0	female	ad
105	cisnes	4	2018	AP	0	0	0	0	0	0	female	ad
106	cisnes	4	2018	AP	0	0	0	0	0	0	female	ad
107	cisnes	4	2018	AP	0	0	0	0	0	0	female	ad
108	cisnes	4	2018	AP	0	0	0	0	0	0	female	ad
109	cisnes	4	2018	AP	0	0	0	0	0	0	female	ad
110	cisnes	4	2018	AP	0	0	0	0	0	0	female	ad
111	cisnes	4	2018	AP	0	0	0	0	0	0	female	ad
112	cisnes	4	2018	AP	0	0	0	0	0	0	female	ad
113	cisnes	4	2018	AP	0	0	0	0	0	0	female	ad
114	cisnes	4	2018	AP	0	0	0	0	0	0	female	ad
115	cisnes	4	2018	AP	0	0	0	0	0	0	female	ad
116	cisnes	4	2018	AP	0	0	0	0	0	0	male	ad
117	cisnes	4	2018	AP	0	0	0	0	0	0	female	ad
118	cisnes	4	2018	AP	0	0	0	0	0	0	female	ad
119	cisnes	4	2018	AP	0	0	0	0	0	0	female	ad
120	cisnes	4	2018	AP	0	0	0	0	0	0	female	ad
121	cisnes	4	2018	AP	0	0	0	0	0	0	female	ad
122	cisnes	4	2018	AP	0	0	0	0	0	0	female	ad
123	cisnes	4	2018	AP	0	0	0	0	0	0	female	ad
124	cisnes	4	2018	AP	0	0	0	0	0	0	female	ad
125	cisnes	4	2018	AP	0	0	0	0	0	0	female	ad
126	cisnes	4	2018	AP	0	0	0	0	0	0	female	ad
127	cisnes	4	2018	AP	0	0	0	0	0	0	female	ad
128	cisnes	4	2018	AP	0	0	0	0	0	0	female	ad
129	cisnes	4	2018	AP	0	0	0	0	0	0	female	ad
130	cisnes	4	2018	AP	0	0	0	0	0	0	female	ad
131	cisnes	4	2018	AP	0	0	0	0	0	0	male	ad
132	cisnes	4	2018	AP	0	0	0	0	0	0	female	ad
133	cisnes	4	2018	AP	0	0	0	0	0	0	male	ad
134	cisnes	4	2018	AP	0	0	0	0	0	0	female	ad
135	cisnes	4	2018	AP	0	0	0	0	0	0	female	ad
136	cisnes	4	2018	AP	0	0	0	0	0	0	female	ad
137	cisnes	4	2018	AP	0	0	0	0	0	0	female	ad
138	cisnes	4	2018	AP	0	0	0	0	0	0	female	ad
139	cisnes	4	2018	AP	0	0	0	0	0	0	female	ad
140	cisnes	4	2018	AP	0	0	0	0	0	0	female	ad
141	cisnes	4	2018	AP	0	0	0	0	0	0	female	ad
142	cisnes	4	2018	AP	0	0	1	0	1	1	female	ad
143	cisnes	4	2018	AP	0	0	0	0	0	0	female	ad
144	cisnes	4	2018	AP	0	0	0	0	0	0	female	ad
145	cisnes	4	2018	AP	0	0	0	0	0	0	female	ad
146	cisnes	4	2018	AP	0	0	0	0	0	0	female	ad
147	cisnes	4	2018	AP	0	0	0	0	0	0	male	ad
148	cisnes	4	2018	AP	0	0	0	0	0	0	female	ad
149	cisnes	4	2018	AP	0	0	0	0	0	0	female	ad
150	cisnes	4	2018	AP	0	0	0	0	0	0	female	ad
151	cisnes	4	2018	AP	0	0	0	0	0	0	female	ad
152	cisnes	4	2018	AP	0	0	0	0	0	0	male	ad
153	cisnes	4	2018	AP	0	0	0	0	0	0	female	ad
154	cisnes	4	2018	AP	0	0	0	0	0	0	female	ad
155	cisnes	4	2018	AP	0	0	0	0	0	0	female	ad
156	cisnes	4	2018	AP	0	0	0	0	0	0	female	ad
157	cisnes	4	2018	AP	0	0	0	0	0	0	female	ad
158	cisnes	4	2018	AP	0	0	0	0	0	0	male	ad
159	cisnes	4	2018	AP	0	0	0	0	0	0	female	ad
160	cisnes	4	2018	AP	0	0	0	0	0	0	female	ad
161	cisnes	4	2018	AP	0	0	0	0	0	0	male	ad
162	cisnes	4	2018	AP	0	0	0	0	0	0	female	ad
163	cisnes	4	2018	AP	0	0	0	0	0	0	female	ad
164	cisnes	4	2018	AP	0	0	0	0	0	0	female	ad
165	cisnes	4	2018	AP	0	0	0	0	0	0	female	ad
166	cisnes	4	2018	AP	0	0	0	0	0	0	female	ad
167	cisnes	4	2018	AP	0	0	1	0	1	1	female	ad
168	cisnes	4	2018	AP	0	0	0	0	0	0	female	juv
169	cisnes	4	2018	AP	0	0	0	0	0	0	female	juv
170	cisnes	4	2018	AP	0	0	0	0	0	0	female	juv
171	cisnes	4	2018	AP	0	0	1	0	1	1	female	juv
172	cisnes	4	2018	AP	0	0	0	0	0	0	female	juv
173	cisnes	4	2018	AP	0	0	0	0	0	0	male	juv
174	cisnes	4	2018	AP	0	0	0	0	0	0	female	juv
175	cisnes	4	2018	AP	0	0	0	0	0	0	male	juv
176	cisnes	4	2018	AP	0	0	0	0	0	0	female	juv
177	cisnes	4	2018	AP	0	0	0	0	0	0	female	juv
178	cisnes	4	2018	AP	0	0	0	0	0	0	female	juv
179	cisnes	4	2018	AP	0	0	0	0	0	0	female	juv
180	cisnes	4	2018	AP	0	0	0	0	0	0	female	juv
181	cisnes	4	2018	AP	0	0	0	0	0	0	female	juv
182	cisnes	4	2018	AP	0	0	0	0	0	0	female	juv
183	cisnes	4	2018	AP	0	0	0	0	0	0	female	juv
184	cisnes	4	2018	AP	0	0	0	0	0	0	male	ad
185	cisnes	4	2018	AP	0	0	0	0	0	0	female	juv
186	cisnes	4	2018	AP	0	0	0	0	0	0	female	juv
187	cisnes	4	2018	AP	0	0	1	0	1	1	female	juv
188	cisnes	4	2018	AP	0	0	0	0	0	0	male	ad
189	cisnes	4	2018	AP	0	0	0	0	0	0	male	juv
190	cisnes	4	2018	AP	0	0	0	0	0	0	female	ad
191	cisnes	4	2018	AP	0	0	0	0	0	0	female	ad
192	cisnes	4	2018	AP	0	0	0	0	0	0	female	juv
193	cisnes	4	2018	AP	0	0	0	0	0	0	female	juv
194	cisnes	4	2018	AP	0	0	0	0	0	0	female	juv
195	cisnes	4	2018	AP	0	0	0	0	0	0	female	juv
196	cisnes	4	2018	AP	0	0	0	0	0	0	female	juv
197	cisnes	4	2018	AP	0	0	0	0	0	0	female	juv
198	cisnes	4	2018	AP	0	0	0	0	0	0	female	juv
199	cisnes	4	2018	AP	0	0	0	0	0	0	female	juv
200	cisnes	4	2018	AP	0	0	0	0	0	0	male	juv

## Sheet: Amarga-SE lagoon-Nov
# indiv	site	month	year	ARTEMIA	Confl podic	Ward sp.	Fimbr sp.	Flamin sp.	overall	SR	sex	stage
1	amarga	11	2017	AP	0	0	0	0	0	0	female	ad
2	amarga	11	2017	AP	0	0	0	0	0	0	female	ad
3	amarga	11	2017	AP	0	0	0	0	0	0	female	ad
4	amarga	11	2017	AP	0	0	0	0	0	0	female	ad
5	amarga	11	2017	AP	0	0	0	0	0	0	female	ad
6	amarga	11	2017	AP	0	0	0	0	0	0	female	ad
7	amarga	11	2017	AP	0	0	0	0	0	0	female	ad
8	amarga	11	2017	AP	0	0	0	0	0	0	female	ad
9	amarga	11	2017	AP	0	0	0	0	0	0	female	ad
10	amarga	11	2017	AP	0	0	0	0	0	0	female	ad
11	amarga	11	2017	AP	0	0	0	0	0	0	female	ad
12	amarga	11	2017	AP	0	0	0	0	0	0	female	ad
13	amarga	11	2017	AP	0	0	0	0	0	0	female	ad
14	amarga	11	2017	AP	0	0	0	0	0	0	female	ad
15	amarga	11	2017	AP	0	0	0	0	0	0	female	ad
16	amarga	11	2017	AP	0	0	0	0	0	0	female	ad
17	amarga	11	2017	AP	0	0	0	0	0	0	female	ad
18	amarga	11	2017	AP	0	0	0	0	0	0	female	ad
19	amarga	11	2017	AP	0	0	0	0	0	0	female	ad
20	amarga	11	2017	AP	0	0	0	0	0	0	female	ad
21	amarga	11	2017	AP	0	0	0	0	0	0	female	ad
22	amarga	11	2017	AP	0	0	0	0	0	0	female	ad
23	amarga	11	2017	AP	0	0	0	0	0	0	female	ad
24	amarga	11	2017	AP	0	0	0	0	0	0	female	ad
25	amarga	11	2017	AP	0	0	0	0	0	0	female	ad
26	amarga	11	2017	AP	0	0	0	0	0	0	female	ad
27	amarga	11	2017	AP	0	0	0	0	0	0	female	ad
28	amarga	11	2017	AP	0	0	0	0	0	0	female	ad
29	amarga	11	2017	AP	0	0	0	0	0	0	female	ad
30	amarga	11	2017	AP	0	0	0	0	0	0	female	ad
31	amarga	11	2017	AP	0	0	0	0	0	0	female	ad
32	amarga	11	2017	AP	0	0	0	0	0	0	female	ad
33	amarga	11	2017	AP	0	0	0	0	0	0	female	ad
34	amarga	11	2017	AP	0	0	0	0	0	0	female	ad
35	amarga	11	2017	AP	0	0	0	0	0	0	female	ad
36	amarga	11	2017	AP	0	0	0	0	0	0	female	ad
37	amarga	11	2017	AP	0	0	0	0	0	0	female	ad
38	amarga	11	2017	AP	0	0	0	0	0	0	female	ad
39	amarga	11	2017	AP	0	0	0	0	0	0	female	ad
40	amarga	11	2017	AP	0	0	0	0	0	0	female	ad
41	amarga	11	2017	AP	0	0	0	0	0	0	female	ad
42	amarga	11	2017	AP	0	0	0	0	0	0	female	ad
43	amarga	11	2017	AP	0	0	0	0	0	0	female	ad
44	amarga	11	2017	AP	0	0	0	0	0	0	female	ad
45	amarga	11	2017	AP	0	0	0	0	0	0	female	ad
46	amarga	11	2017	AP	0	0	0	0	0	0	female	ad
47	amarga	11	2017	AP	0	0	0	0	0	0	female	ad
48	amarga	11	2017	AP	0	0	0	0	0	0	female	ad
49	amarga	11	2017	AP	0	0	1	0	1	1	female	ad
50	amarga	11	2017	AP	0	0	0	0	0	0	female	ad
51	amarga	11	2017	AP	0	0	0	0	0	0	female	ad
52	amarga	11	2017	AP	0	0	0	0	0	0	female	ad
53	amarga	11	2017	AP	0	0	0	0	0	0	female	ad
54	amarga	11	2017	AP	0	0	0	0	0	0	female	ad
55	amarga	11	2017	AP	0	0	0	0	0	0	female	ad
56	amarga	11	2017	AP	0	0	0	0	0	0	female	ad
57	amarga	11	2017	AP	0	0	0	0	0	0	female	ad
58	amarga	11	2017	AP	0	0	0	0	0	0	female	ad
59	amarga	11	2017	AP	0	0	0	0	0	0	female	ad
60	amarga	11	2017	AP	0	0	0	0	0	0	female	ad
61	amarga	11	2017	AP	0	0	0	0	0	0	female	ad
62	amarga	11	2017	AP	0	0	0	0	0	0	female	ad
63	amarga	11	2017	AP	0	0	0	0	0	0	female	ad
64	amarga	11	2017	AP	0	0	0	0	0	0	female	ad
65	amarga	11	2017	AP	0	0	0	0	0	0	female	ad
66	amarga	11	2017	AP	0	0	0	0	0	0	female	ad
67	amarga	11	2017	AP	0	0	0	0	0	0	female	ad
68	amarga	11	2017	AP	0	0	0	0	0	0	female	ad
69	amarga	11	2017	AP	0	0	0	0	0	0	female	ad
70	amarga	11	2017	AP	0	0	0	0	0	0	female	ad
71	amarga	11	2017	AP	0	0	0	0	0	0	female	ad
72	amarga	11	2017	AP	0	0	0	0	0	0	female	ad
73	amarga	11	2017	AP	0	0	0	0	0	0	female	ad
74	amarga	11	2017	AP	0	0	0	0	0	0	female	ad
75	amarga	11	2017	AP	0	0	0	0	0	0	female	ad
76	amarga	11	2017	AP	0	0	0	0	0	0	female	ad
77	amarga	11	2017	AP	0	0	0	0	0	0	female	ad
78	amarga	11	2017	AP	0	0	0	0	0	0	female	ad
79	amarga	11	2017	AP	0	0	0	0	0	0	female	ad
80	amarga	11	2017	AP	0	0	0	0	0	0	female	ad
81	amarga	11	2017	AP	0	0	0	0	0	0	female	ad
82	amarga	11	2017	AP	0	0	0	0	0	0	female	ad
83	amarga	11	2017	AP	0	0	0	0	0	0	female	ad
84	amarga	11	2017	AP	0	0	0	0	0	0	female	ad
85	amarga	11	2017	AP	0	0	1	0	1	1	female	ad
86	amarga	11	2017	AP	0	0	0	0	0	0	female	ad
87	amarga	11	2017	AP	0	0	0	0	0	0	female	ad
88	amarga	11	2017	AP	0	0	0	0	0	0	female	ad
89	amarga	11	2017	AP	0	0	0	0	0	0	female	ad
90	amarga	11	2017	AP	0	0	0	0	0	0	female	ad
91	amarga	11	2017	AP	0	0	0	0	0	0	female	ad
92	amarga	11	2017	AP	1	0	1	0	2	2	female	ad
93	amarga	11	2017	AP	0	0	0	0	0	0	female	ad
94	amarga	11	2017	AP	0	0	0	0	0	0	female	ad
95	amarga	11	2017	AP	0	0	0	0	0	0	male	ad
96	amarga	11	2017	AP	0	0	0	0	0	0	male	ad
97	amarga	11	2017	AP	0	0	0	0	0	0	male	ad
98	amarga	11	2017	AP	0	0	0	0	0	0	male	ad
99	amarga	11	2017	AP	0	0	0	0	0	0	male	ad
100	amarga	11	2017	AP	0	0	0	0	0	0	male	ad
101	amarga	11	2017	AP	0	0	0	0	0	0	male	ad
102	amarga	11	2017	AP	0	0	0	0	0	0	male	ad
103	amarga	11	2017	AP	0	0	0	0	0	0	male	ad
104	amarga	11	2017	AP	0	0	0	0	0	0	male	ad
105	amarga	11	2017	AP	0	0	0	0	0	0	male	ad
106	amarga	11	2017	AP	0	0	0	0	0	0	male	ad
107	amarga	11	2017	AP	0	0	0	0	0	0	male	ad
108	amarga	11	2017	AP	0	0	0	0	0	0	male	ad
109	amarga	11	2017	AP	0	0	0	0	0	0	male	ad
110	amarga	11	2017	AP	0	0	0	0	0	0	male	ad
111	amarga	11	2017	AP	0	0	0	0	0	0	male	ad
112	amarga	11	2017	AP	0	0	0	0	0	0	male	ad
113	amarga	11	2017	AP	0	0	0	0	0	0	male	ad
114	amarga	11	2017	AP	0	0	0	0	0	0	male	ad
115	amarga	11	2017	AP	0	0	0	0	0	0	male	ad
116	amarga	11	2017	AP	0	0	0	0	0	0	male	ad
117	amarga	11	2017	AP	0	0	0	0	0	0	male	ad
118	amarga	11	2017	AP	0	0	0	0	0	0	male	ad
119	amarga	11	2017	AP	0	0	0	0	0	0	male	ad
120	amarga	11	2017	AP	0	0	0	0	0	0	male	ad
121	amarga	11	2017	AP	0	0	0	0	0	0	male	ad
122	amarga	11	2017	AP	0	0	0	0	0	0	male	ad
123	amarga	11	2017	AP	0	0	0	0	0	0	male	ad
124	amarga	11	2017	AP	0	0	0	0	0	0	male	ad
125	amarga	11	2017	AP	0	0	0	0	0	0	male	ad
126	amarga	11	2017	AP	0	0	0	0	0	0	male	ad
127	amarga	11	2017	AP	0	0	0	0	0	0	female	ad
128	amarga	11	2017	AP	0	0	0	0	0	0	male	ad
129	amarga	11	2017	AP	0	0	0	0	0	0	male	ad
130	amarga	11	2017	AP	0	0	0	0	0	0	male	ad
131	amarga	11	2017	AP	0	0	0	0	0	0	male	ad
132	amarga	11	2017	AP	0	0	0	0	0	0	male	ad
133	amarga	11	2017	AP	0	0	0	0	0	0	male	ad
134	amarga	11	2017	AP	0	0	0	0	0	0	female	ad
135	amarga	11	2017	AP	0	0	0	0	0	0	male	ad
136	amarga	11	2017	AP	0	0	0	0	0	0	male	ad
137	amarga	11	2017	AP	0	0	0	0	0	0	male	ad
138	amarga	11	2017	AP	0	0	0	0	0	0	male	ad
139	amarga	11	2017	AP	0	0	0	0	0	0	male	ad
140	amarga	11	2017	AP	0	0	0	0	0	0	male	ad
141	amarga	11	2017	AP	0	0	0	0	0	0	male	ad
142	amarga	11	2017	AP	0	0	0	0	0	0	male	ad
143	amarga	11	2017	AP	0	0	0	0	0	0	male	ad
144	amarga	11	2017	AP	0	0	0	0	0	0	male	ad
145	amarga	11	2017	AP	0	0	0	0	0	0	male	ad
146	amarga	11	2017	AP	0	0	0	0	0	0	male	ad
147	amarga	11	2017	AP	0	0	0	0	0	0	male	ad
148	amarga	11	2017	AP	0	0	0	0	0	0	male	ad
149	amarga	11	2017	AP	0	0	0	0	0	0	male	ad
150	amarga	11	2017	AP	0	0	0	0	0	0	male	ad
151	amarga	11	2017	AP	0	0	0	0	0	0	male	ad
152	amarga	11	2017	AP	0	0	0	0	0	0	male	ad
153	amarga	11	2017	AP	0	0	0	0	0	0	male	ad
154	amarga	11	2017	AP	0	0	0	0	0	0	male	ad
155	amarga	11	2017	AP	0	0	0	0	0	0	male	ad
156	amarga	11	2017	AP	0	0	0	0	0	0	male	ad
157	amarga	11	2017	AP	0	0	0	0	0	0	male	ad
158	amarga	11	2017	AP	0	0	0	0	0	0	male	ad
159	amarga	11	2017	AP	0	0	0	0	0	0	male	ad
160	amarga	11	2017	AP	0	0	0	0	0	0	male	ad
161	amarga	11	2017	AP	0	0	0	0	0	0	male	ad
162	amarga	11	2017	AP	0	0	0	0	0	0	male	ad
163	amarga	11	2017	AP	0	0	0	0	0	0	male	ad
164	amarga	11	2017	AP	0	0	0	0	0	0	male	ad
165	amarga	11	2017	AP	0	0	0	0	0	0	male	ad
166	amarga	11	2017	AP	0	0	0	0	0	0	male	ad
167	amarga	11	2017	AP	0	0	0	0	0	0	male	ad
168	amarga	11	2017	AP	0	0	0	0	0	0	male	ad
169	amarga	11	2017	AP	0	0	0	0	0	0	male	ad
170	amarga	11	2017	AP	0	0	0	0	0	0	male	ad
171	amarga	11	2017	AP	0	0	0	0	0	0	male	ad
172	amarga	11	2017	AP	0	0	0	0	0	0	male	ad
173	amarga	11	2017	AP	0	0	0	0	0	0	male	ad
174	amarga	11	2017	AP	0	0	0	0	0	0	female	ad
175	amarga	11	2017	AP	0	0	0	0	0	0	female	ad
176	amarga	11	2017	AP	0	0	0	0	0	0	female	ad
177	amarga	11	2017	AP	0	0	0	0	0	0	female	ad
178	amarga	11	2017	AP	0	0	0	0	0	0	female	ad
179	amarga	11	2017	AP	0	0	1	0	1	1	female	ad
180	amarga	11	2017	AP	0	0	0	0	0	0	female	ad
181	amarga	11	2017	AP	0	0	0	0	0	0	female	ad
182	amarga	11	2017	AP	0	0	0	0	0	0	female	ad
183	amarga	11	2017	AP	0	0	0	0	0	0	female	ad
184	amarga	11	2017	AP	0	0	0	0	0	0	female	ad
185	amarga	11	2017	AP	0	0	0	0	0	0	female	ad
186	amarga	11	2017	AP	0	0	0	0	0	0	female	ad
187	amarga	11	2017	AP	1	0	0	0	1	1	female	ad
188	amarga	11	2017	AP	0	0	0	0	0	0	female	ad
189	amarga	11	2017	AP	0	0	0	0	0	0	female	ad
190	amarga	11	2017	AP	0	0	0	0	0	0	female	ad
191	amarga	11	2017	AP	0	0	0	0	0	0	female	ad
192	amarga	11	2017	AP	0	0	0	0	0	0	female	ad
193	amarga	11	2017	AP	0	0	0	0	0	0	female	ad
194	amarga	11	2017	AP	0	0	0	0	0	0	female	ad
195	amarga	11	2017	AP	0	0	0	0	0	0	female	ad
196	amarga	11	2017	AP	0	0	0	0	0	0	female	ad
197	amarga	11	2017	AP	0	0	0	0	0	0	female	ad
198	amarga	11	2017	AP	0	0	0	0	0	0	female	ad
199	amarga	11	2017	AP	0	0	0	0	0	0	female	ad
200	amarga	11	2017	AP	0	0	0	0	0	0	female	ad

## Sheet: Amarga-SE lagoon-April
# indiv	site	month	year	ARTEMIA	Confl podic	Ward sp.	Fimbr sp.	Flamin sp.	overall	SR	sex	stage
1	amarga	4	2018	AP	0	0	0	0	0	0	male	ad
2	amarga	4	2018	AP	0	0	0	0	0	0	female	ad
3	amarga	4	2018	AP	0	0	0	0	0	0	male	ad
4	amarga	4	2018	AP	0	0	0	0	0	0	male	ad
5	amarga	4	2018	AP	0	0	0	0	0	0	female	ad
6	amarga	4	2018	AP	0	0	0	0	0	0	female	ad
7	amarga	4	2018	AP	0	0	0	0	0	0	female	ad
8	amarga	4	2018	AP	0	0	0	0	0	0	female	ad
9	amarga	4	2018	AP	0	0	0	0	0	0	female	ad
10	amarga	4	2018	AP	0	0	0	0	0	0	male	ad
11	amarga	4	2018	AP	0	0	0	0	0	0	male	ad
12	amarga	4	2018	AP	0	0	0	0	0	0	male	ad
13	amarga	4	2018	AP	0	0	0	0	0	0	female	ad
14	amarga	4	2018	AP	0	0	0	0	0	0	male	ad
15	amarga	4	2018	AP	0	0	0	0	0	0	male	ad
16	amarga	4	2018	AP	0	0	0	0	0	0	female	ad
17	amarga	4	2018	AP	0	0	0	0	0	0	female	ad
18	amarga	4	2018	AP	0	0	0	0	0	0	male	ad
19	amarga	4	2018	AP	0	0	0	0	0	0	female	ad
20	amarga	4	2018	AP	0	0	0	0	0	0	male	ad
21	amarga	4	2018	AP	0	0	0	0	0	0	male	ad
22	amarga	4	2018	AP	0	0	0	0	0	0	female	ad
23	amarga	4	2018	AP	0	0	0	0	0	0	male	juv
24	amarga	4	2018	AP	0	0	0	0	0	0	female	juv
25	amarga	4	2018	AP	0	0	0	0	0	0	male	juv
26	amarga	4	2018	AP	0	0	0	0	0	0	female	juv
27	amarga	4	2018	AP	0	0	0	0	0	0	female	juv
28	amarga	4	2018	AP	0	0	0	0	0	0	female	juv
29	amarga	4	2018	AP	0	0	0	0	0	0	male	ad
30	amarga	4	2018	AP	0	0	0	0	0	0	male	juv
31	amarga	4	2018	AP	0	0	0	0	0	0	male	juv
32	amarga	4	2018	AP	0	0	0	0	0	0	male	juv
33	amarga	4	2018	AP	0	0	0	0	0	0	female	juv
34	amarga	4	2018	AP	0	0	0	0	0	0	female	juv
35	amarga	4	2018	AP	0	0	0	0	0	0	female	juv
36	amarga	4	2018	AP	0	0	0	0	0	0	female	juv
37	amarga	4	2018	AP	0	0	0	0	0	0	female	juv
38	amarga	4	2018	AP	0	0	0	0	0	0	male	ad
39	amarga	4	2018	AP	0	0	0	0	0	0	male	ad
40	amarga	4	2018	AP	0	0	0	0	0	0	female	ad
41	amarga	4	2018	AP	0	0	0	0	0	0	female	juv
42	amarga	4	2018	AP	0	0	0	0	0	0	male	juv
43	amarga	4	2018	AP	0	0	0	0	0	0	male	juv
44	amarga	4	2018	AP	0	0	0	0	0	0	female	juv
45	amarga	4	2018	AP	0	0	0	0	0	0	female	juv
46	amarga	4	2018	AP	0	0	0	0	0	0	male	juv
47	amarga	4	2018	AP	0	0	0	0	0	0	female	juv
48	amarga	4	2018	AP	0	0	0	0	0	0	female	juv
49	amarga	4	2018	AP	0	0	0	0	0	0	male	juv
50	amarga	4	2018	AP	0	0	0	0	0	0	male	juv
51	amarga	4	2018	AP	0	0	0	0	0	0	male	juv
52	amarga	4	2018	AP	0	0	0	0	0	0	male	juv
53	amarga	4	2018	AP	0	0	0	0	0	0	male	juv
54	amarga	4	2018	AP	0	0	0	0	0	0	male	juv
55	amarga	4	2018	AP	0	0	0	0	0	0	female	juv
56	amarga	4	2018	AP	0	0	0	0	0	0	female	juv
57	amarga	4	2018	AP	0	0	0	0	0	0	female	juv
58	amarga	4	2018	AP	0	0	0	0	0	0	female	juv
59	amarga	4	2018	AP	0	0	0	0	0	0	male	juv
60	amarga	4	2018	AP	0	0	0	0	0	0	female	juv
61	amarga	4	2018	AP	0	0	0	0	0	0	male	juv
62	amarga	4	2018	AP	0	0	0	0	0	0	female	juv
63	amarga	4	2018	AP	0	0	0	0	0	0	female	juv
64	amarga	4	2018	AP	0	0	0	0	0	0	female	juv
65	amarga	4	2018	AP	0	0	0	0	0	0	male	juv
66	amarga	4	2018	AP	0	0	0	0	0	0	female	juv
67	amarga	4	2018	AP	0	0	0	0	0	0	male	juv
68	amarga	4	2018	AP	0	0	0	0	0	0	female	juv
69	amarga	4	2018	AP	0	0	0	0	0	0	male	juv
70	amarga	4	2018	AP	0	0	0	0	0	0	male	juv
71	amarga	4	2018	AP	0	0	0	0	0	0	female	ad
72	amarga	4	2018	AP	0	0	0	0	0	0	female	juv
73	amarga	4	2018	AP	0	0	0	0	0	0	male	juv
74	amarga	4	2018	AP	0	0	0	0	0	0	female	juv
75	amarga	4	2018	AP	0	0	1	0	1	1	male	juv
76	amarga	4	2018	AP	0	0	0	0	0	0	female	juv
77	amarga	4	2018	AP	0	0	0	0	0	0	female	juv
78	amarga	4	2018	AP	0	0	0	0	0	0	male	juv
79	amarga	4	2018	AP	0	0	0	0	0	0	female	juv
80	amarga	4	2018	AP	0	0	0	0	0	0	female	juv
81	amarga	4	2018	AP	0	0	0	0	0	0	male	juv
82	amarga	4	2018	AP	0	0	0	0	0	0	female	juv
83	amarga	4	2018	AP	0	0	0	0	0	0	female	juv
84	amarga	4	2018	AP	0	0	0	0	0	0	female	juv
85	amarga	4	2018	AP	0	0	0	0	0	0	female	juv
86	amarga	4	2018	AP	0	0	0	0	0	0	female	juv
87	amarga	4	2018	AP	0	0	0	0	0	0	female	juv
88	amarga	4	2018	AP	0	0	0	0	0	0	male	juv
89	amarga	4	2018	AP	0	0	0	0	0	0	female	juv
90	amarga	4	2018	AP	0	0	1	0	1	1	male	juv
91	amarga	4	2018	AP	0	0	0	0	0	0	female	juv
92	amarga	4	2018	AP	0	0	0	0	0	0	female	juv
93	amarga	4	2018	AP	0	0	0	0	0	0	female	juv
94	amarga	4	2018	AP	0	0	0	0	0	0	female	juv
95	amarga	4	2018	AP	0	0	0	0	0	0	female	juv
96	amarga	4	2018	AP	0	0	0	0	0	0	female	juv
97	amarga	4	2018	AP	0	0	0	0	0	0	female	juv
98	amarga	4	2018	AP	0	0	0	0	0	0	male	juv
99	amarga	4	2018	AP	0	0	0	0	0	0	female	juv
100	amarga	4	2018	AP	0	0	0	0	0	0	female	juv
101	amarga	4	2018	AP	0	0	0	0	0	0	male	juv
102	amarga	4	2018	AP	0	0	0	0	0	0	female	juv
103	amarga	4	2018	AP	0	0	0	0	0	0	female	juv
104	amarga	4	2018	AP	0	0	0	0	0	0	male	juv
105	amarga	4	2018	AP	0	0	0	0	0	0	female	juv
106	amarga	4	2018	AP	0	0	0	0	0	0	female	juv
107	amarga	4	2018	AP	0	0	0	0	0	0	male	juv
108	amarga	4	2018	AP	0	0	0	0	0	0	male	juv
109	amarga	4	2018	AP	0	0	0	0	0	0	female	juv
110	amarga	4	2018	AP	0	0	0	0	0	0	female	juv
111	amarga	4	2018	AP	0	0	0	0	0	0	female	juv
112	amarga	4	2018	AP	0	0	0	0	0	0	male	juv
113	amarga	4	2018	AP	0	0	0	0	0	0	male	juv
114	amarga	4	2018	AP	0	0	0	0	0	0	male	juv
115	amarga	4	2018	AP	0	0	0	0	0	0	female	juv
116	amarga	4	2018	AP	0	0	0	0	0	0	female	juv
117	amarga	4	2018	AP	0	0	0	0	0	0	female	juv
118	amarga	4	2018	AP	0	0	0	0	0	0	female	juv
119	amarga	4	2018	AP	0	0	0	0	0	0	female	juv
120	amarga	4	2018	AP	0	0	0	0	0	0	male	juv
121	amarga	4	2018	AP	0	0	0	0	0	0	female	juv
122	amarga	4	2018	AP	0	0	0	0	0	0	male	juv
123	amarga	4	2018	AP	0	0	0	0	0	0	female	juv
124	amarga	4	2018	AP	0	0	0	0	0	0	male	juv
125	amarga	4	2018	AP	0	0	0	0	0	0	female	juv
126	amarga	4	2018	AP	0	0	0	0	0	0	female	juv
127	amarga	4	2018	AP	0	0	0	0	0	0	male	juv
128	amarga	4	2018	AP	0	0	0	0	0	0	male	juv
129	amarga	4	2018	AP	0	0	0	0	0	0	male	juv
130	amarga	4	2018	AP	0	0	0	0	0	0	female	juv
131	amarga	4	2018	AP	0	0	0	0	0	0	female	juv
132	amarga	4	2018	AP	0	0	0	0	0	0	male	juv
133	amarga	4	2018	AP	0	0	0	0	0	0	female	juv
134	amarga	4	2018	AP	0	0	0	0	0	0	female	juv
135	amarga	4	2018	AP	0	0	0	0	0	0	female	juv
136	amarga	4	2018	AP	0	0	0	0	0	0	male	juv
137	amarga	4	2018	AP	0	0	0	0	0	0	female	juv
138	amarga	4	2018	AP	0	0	0	0	0	0	male	juv
139	amarga	4	2018	AP	0	0	0	0	0	0	female	juv
140	amarga	4	2018	AP	0	0	0	0	0	0	male	juv
141	amarga	4	2018	AP	0	0	0	0	0	0	female	juv
142	amarga	4	2018	AP	0	0	0	0	0	0	female	juv
143	amarga	4	2018	AP	0	0	0	0	0	0	female	juv
144	amarga	4	2018	AP	0	0	0	0	0	0	male	juv
145	amarga	4	2018	AP	0	0	0	0	0	0	male	juv
146	amarga	4	2018	AP	0	0	0	0	0	0	female	juv
147	amarga	4	2018	AP	0	0	0	0	0	0	male	juv
148	amarga	4	2018	AP	0	0	0	0	0	0	male	juv
149	amarga	4	2018	AP	0	0	0	0	0	0	male	juv
150	amarga	4	2018	AP	0	0	0	0	0	0	male	juv
151	amarga	4	2018	AP	0	0	0	0	0	0	female	juv
152	amarga	4	2018	AP	0	0	0	0	0	0	female	juv
153	amarga	4	2018	AP	0	0	0	0	0	0	female	juv
154	amarga	4	2018	AP	0	0	0	0	0	0	female	juv
155	amarga	4	2018	AP	0	0	0	0	0	0	female	juv
156	amarga	4	2018	AP	0	0	0	0	0	0	female	juv
157	amarga	4	2018	AP	0	0	0	0	0	0	female	juv
158	amarga	4	2018	AP	0	0	1	0	1	1	female	ad
159	amarga	4	2018	AP	0	0	1	0	1	1	male	ad
160	amarga	4	2018	AP	0	0	0	0	0	0	male	juv
161	amarga	4	2018	AP	0	0	0	0	0	0	male	ad
162	amarga	4	2018	AP	0	0	0	0	0	0	male	ad
163	amarga	4	2018	AP	0	0	0	0	0	0	male	ad
164	amarga	4	2018	AP	0	0	0	0	0	0	male	ad
165	amarga	4	2018	AP	0	0	0	0	0	0	male	ad
166	amarga	4	2018	AP	0	0	0	0	0	0	male	ad
167	amarga	4	2018	AP	0	0	0	0	0	0	female	ad
168	amarga	4	2018	AP	0	0	0	0	0	0	female	ad
169	amarga	4	2018	AP	0	0	0	0	0	0	female	ad
170	amarga	4	2018	AP	0	0	0	0	0	0	female	ad
171	amarga	4	2018	AP	0	0	0	0	0	0	female	ad
172	amarga	4	2018	AP	0	0	0	0	0	0	female	ad
173	amarga	4	2018	AP	0	0	0	0	0	0	female	ad
174	amarga	4	2018	AP	0	0	0	0	0	0	female	ad
175	amarga	4	2018	AP	0	0	0	0	0	0	female	ad
176	amarga	4	2018	AP	0	0	0	0	0	0	female	ad
177	amarga	4	2018	AP	0	0	1	0	1	1	male	ad
178	amarga	4	2018	AP	0	0	0	0	0	0	female	ad
179	amarga	4	2018	AP	0	0	0	0	0	0	female	ad
180	amarga	4	2018	AP	0	0	0	0	0	0	female	ad
181	amarga	4	2018	AP	0	0	0	0	0	0	female	ad
182	amarga	4	2018	AP	0	0	0	0	0	0	male	ad
183	amarga	4	2018	AP	0	0	0	0	0	0	female	ad
184	amarga	4	2018	AP	0	0	0	0	0	0	female	ad
185	amarga	4	2018	AP	0	0	1	0	1	1	male	ad
186	amarga	4	2018	AP	0	0	0	0	0	0	male	ad
187	amarga	4	2018	AP	0	0	0	0	0	0	male	ad
188	amarga	4	2018	AP	0	0	0	0	0	0	male	ad
189	amarga	4	2018	AP	0	0	0	0	0	0	female	ad
190	amarga	4	2018	AP	0	0	0	0	0	0	male	ad
191	amarga	4	2018	AP	0	0	0	0	0	0	female	ad
192	amarga	4	2018	AP	0	0	0	0	0	0	female	ad
193	amarga	4	2018	AP	0	0	0	0	0	0	female	ad
194	amarga	4	2018	AP	0	0	0	0	0	0	female	ad
195	amarga	4	2018	AP	0	0	0	0	0	0	female	ad
196	amarga	4	2018	AP	0	0	0	0	0	0	male	ad
197	amarga	4	2018	AP	0	0	0	0	0	0	male	ad
198	amarga	4	2018	AP	0	0	0	0	0	0	male	ad
199	amarga	4	2018	AP	0	0	0	0	0	0	male	ad
200	amarga	4	2018	AP	0	0	0	0	0	0	male	ad

## Sheet: Cisnes-extra
# individual	site	month	year	ARTEMIA	Confl podic	Ward sp.	Fimbr sp.	Flamin sp.	overall	SR	sex	stage
201	cisnes	11	2017	AP	0	0	0	0	0	0	female	adult
202	cisnes	11	2017	AP	0	0	0	0	0	0	female	adult
203	cisnes	11	2017	AP	0	0	0	0	0	0	female	adult
204	cisnes	11	2017	AP	0	0	0	0	0	0	female	adult
205	cisnes	11	2017	AP	0	0	0	1	1	1	female	adult
206	cisnes	11	2017	AP	0	0	0	0	0	0	female	adult
207	cisnes	11	2017	AP	0	1	0	0	1	1	female	adult
